# Supplementary material
Source: PubMed Central journal article supplement (PMC4524250)
Supplement: JVI.01221-14_zjv016150641so1.pdf [file JVI.01221-14_zjv016150641so1.pdf]

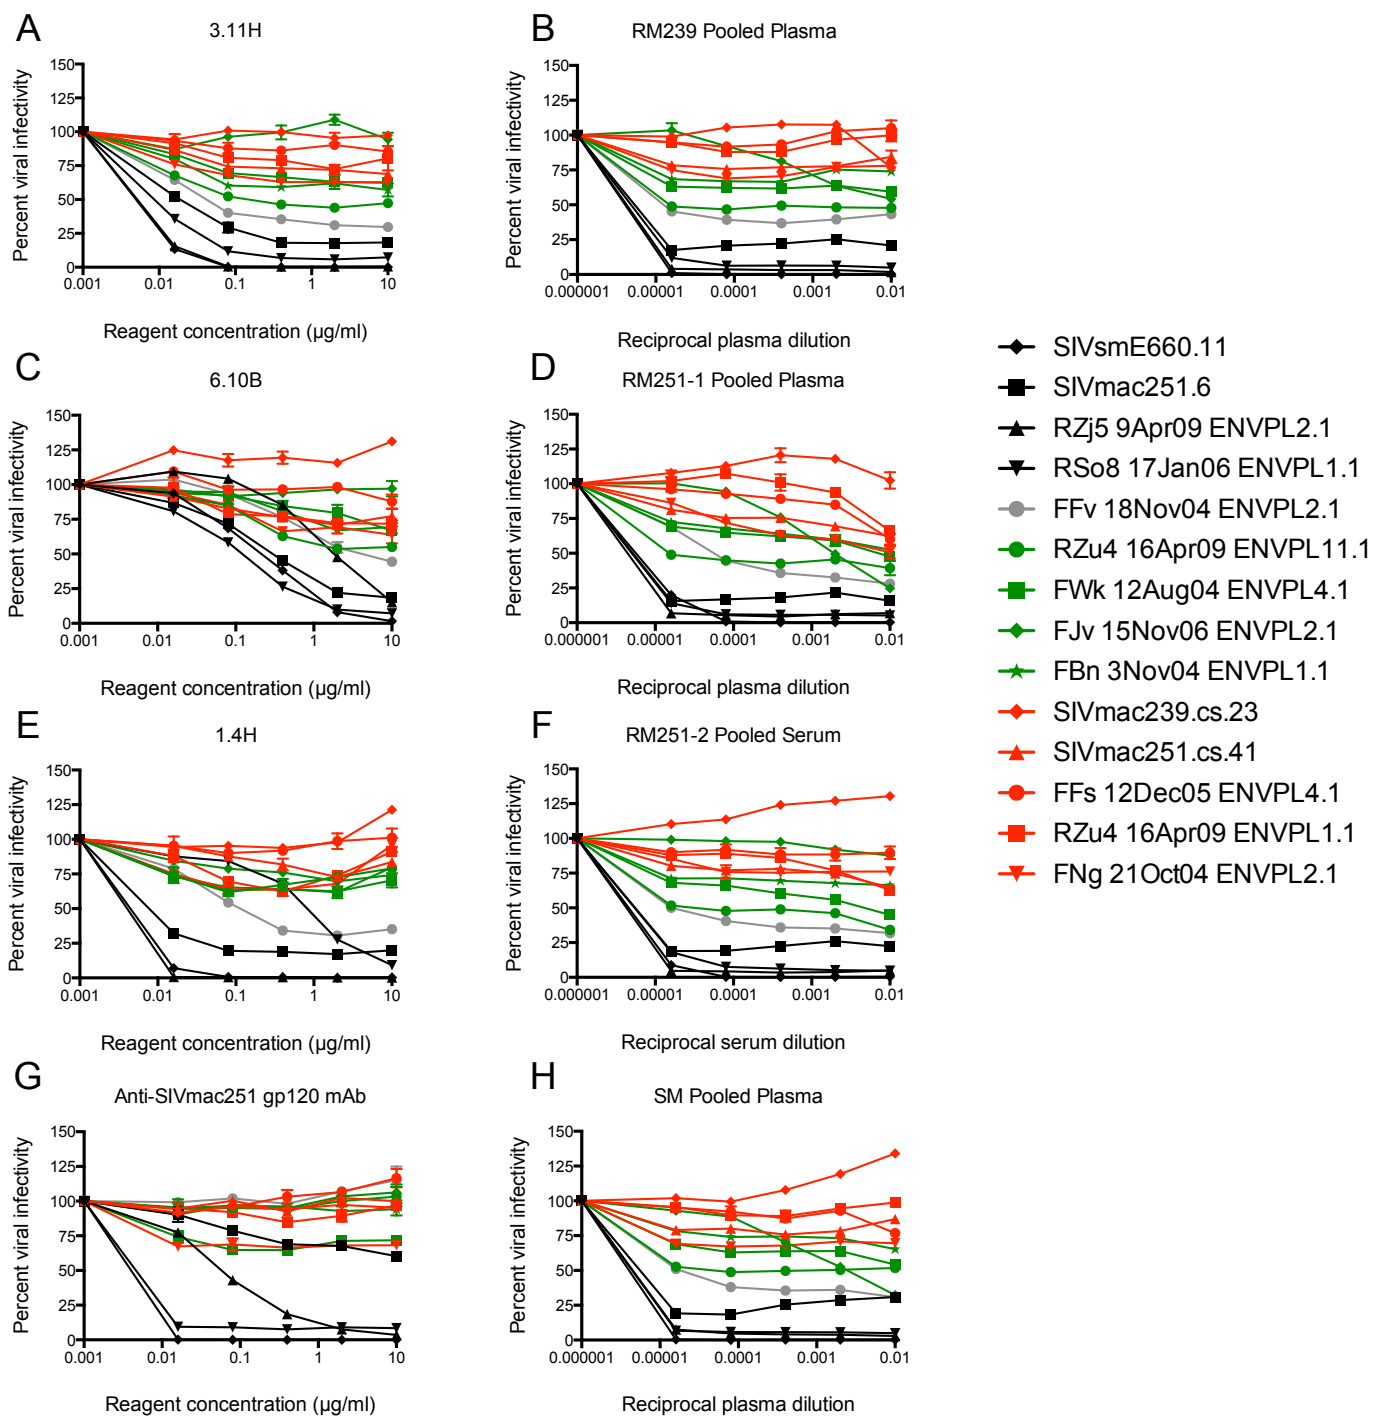

**Supplementary Figure 1. Neutralization of SIVsm Env panel by SIV-infected pools and monoclonal antibodies.** Eight different reagents were serially diluted five-fold and tested for their neutralizing capacity against pseudoviruses expressing each SIVsm Env from the panel using the Tzm-bl assay, with luciferase activity as the readout. The reagents used were a mAb from an SIV-infected rhesus macaque that targets V3 (A, 3.11H), two mAbs from an HIV-2 infected patient that target the CD4bs (C, 6.10B) and a CD4i epitope (E, 1.4H), and a mAb from an immunized mouse that targets an undefined epitope on gp120 (G, anti-mac251 gp120), plasma pools from experimentally SIVmac239-infected (B, RM239) and SIVmac251-infected rhesus macaques and (D, RM251-1), a serum pool from a different set of experimentally SIVmac251-infected rhesus macaques (F, RM251-2), a plasma pool from naturally SIV-infected sooty mangabeys (H, SM). More details are provided for each reagent in Table 3. The reciprocal dilution of plasma/serum or reagent concentration is presented on the x-axis on a log<sub>10</sub> scale, and the percent viral infectivity relative to the absence of test plasma/serum or reagent (100%) is shown on the y-axis. The Env pseudoviruses are colored according to tier (tier 1a is black, tier 1b is gray, tier 2 is green, tier 3 is red). Each Env pseudovirus and reagent/serum/plasma combination was tested in duplicate wells in at least two independent experiments, and the standard error of the mean (SEM) is shown by error bars on the graphs.

Table S1. Immunized animals that were sampled for the serum pools for each vaccine trial

| M11 - Week 13 Post-MVA |             |        |          | M12 - Week 13 Post-MVA |             |        |          | M2 - Week 2 Post-Protein boost |              |        |          | M15 - Week 2 Post-MVA |             |        |          |
|------------------------|-------------|--------|----------|------------------------|-------------|--------|----------|--------------------------------|--------------|--------|----------|-----------------------|-------------|--------|----------|
| Trial                  | Vaccination | Animal | Infected | Trial                  | Vaccination | Animal | Infected | Trial                          | Vaccination  | Animal | Infected | Trial                 | Vaccination | Animal | Infected |
| M11                    | DDMM        | RAw10  | Yes      | M12                    | DM/CD40L    | GE04   | Yes      | M2                             | Protein+Alum | RSe8   | Yes      | M15                   | DDMM        | VXW    | Yes      |
| M11                    | DDMM        | RQw9   | Yes      | M12                    | DM/CD40L    | RNd12  | Yes      | M2                             | Protein+Alum | RNe8   | Yes      | M15                   | DDMM        | REb5   | Yes      |
| M11                    | DDMM        | RDu10  | Yes      | M12                    | DM/CD40L    | GL08   | Yes      | M2                             | Protein+Alum | Rlc4   | Yes      | M15                   | DDMM        | RRo10  | Yes      |
| M11                    | DDMM        | RJn11  | Yes      | M12                    | DM/CD40L    | RGg11  | Yes      | M2                             | Protein+Alum | RWf5   | Yes      | M15                   | DDMM        | RCp5   | Yes      |
| M11                    | DDMM        | RTi10  | Yes      | M12                    | DM/CD40L    | FR95   | Yes      | M2                             | Protein+Alum | RWv8   | Yes      | M15                   | DDMM        | RSz10  | Yes      |
| M11                    | DDMM        | RJf11  | Yes      | M12                    | DM/CD40L    | GC66   | Yes      | M2                             | Protein+Alum | RKa7   | Yes      | M15                   | DgDgMM      | RWk5   | Yes      |
| M11                    | DgDgMM      | RTs10  | Yes      | M12                    | DM/CD40L    | FP36   | Yes      | M2                             | Protein+Alum | RJg4   | Yes      | M15                   | DgDgMM      | RQt5   | Yes      |
| M11                    | DgDgMM      | RRa11  | Yes      | M12                    | DM/CD40L    | FT75   | Yes      | M2                             | Protein+NP   | RHe4   | Yes      | M15                   | DgDgMM      | RPe8   | Yes      |
| M11                    | MMM         | RQh11  | Yes      | M12                    | DM/CD40L    | GM06   | No       | M2                             | Protein+NP   | RPs6   | Yes      | M15                   | DgDgMM      | RTq3   | Yes      |
| M11                    | MMM         | RLk11  | Yes      | M12                    | DM/CD40L    | RKb12  | No       | M2                             | Protein+NP   | RMv5   | Yes      | M15                   | DgDgMM      | RKq10  | Yes      |
| M11                    | MMM         | RVc11  | Yes      | M12                    | DM/CD40L    | RQk11  | No       | M2                             | Protein+NP   | RUj5   | Yes      | M15                   | DgDgMM      | RBc6   | Yes      |
| M11                    | MMM         | RDb10  | Yes      | M12                    | DM/CD40L    | GM99   | No       | M2                             | Protein+NP   | RMj7   | Yes      | M15                   | DgDgMM      | RAg10  | Yes      |
| M11                    | MMM         | RLi10  | Yes      |                        |             |        |          | M2                             | VLP+Alum     | RKu9   | Yes      | M15                   | DDMM        | RTv10  | No       |
| M11                    | MMM         | RJI10  | Yes      |                        |             |        |          | M2                             | VLP+Alum     | RWt7   | Yes      | M15                   | DDMM        | RGp11  | No       |
| M11                    | DDMM        | RZp10  | No       |                        |             |        |          | M2                             | VLP+Alum     | RAC6   | Yes      | M15                   | DDMM        | RWr4   | No       |
| M11                    | DDMM        | RNI11  | No       |                        |             |        |          | M2                             | VLP+Alum     | RPk8   | Yes      | M15                   | DDMM        | RNd7   | No       |
| M11                    | DgDgMM      | RFm11  | No       |                        |             |        |          | M2                             | VLP+Alum     | RCi8   | Yes      | M15                   | DgDgMM      | RWe10  | No       |
| M11                    | DgDgMM      | RKk11  | No       |                        |             |        |          | M2                             | VLP+Alum     | RCj7   | Yes      | M15                   | DgDgMM      | RZb10  | No       |
| M11                    | DgDgMM      | RPv10  | No       |                        |             |        |          | M2                             | VLP+NP       | RBh9   | Yes      | M15                   | DgDgMM      | RLq9   | No       |
| M11                    | DgDgMM      | RWg11  | No       |                        |             |        |          | M2                             | VLP+NP       | REe8   | Yes      |                       |             |        |          |
| M11                    | DgDgMM      | RLe11  | No       |                        |             |        |          | M2                             | VLP+NP       | RJe8   | Yes      |                       |             |        |          |
| M11                    | MMM         | RUh11  | No       |                        |             |        |          | M2                             | VLP+NP       | Rij9   | Yes      |                       |             |        |          |
| M11                    | MMM         | RKk10  | No       |                        |             |        |          | M2                             | Protein+Alum | RZc5   | No       |                       |             |        |          |
|                        |             |        |          |                        |             |        |          | M2                             | Protein+Alum | RVd8   | No       |                       |             |        |          |
|                        |             |        |          |                        |             |        |          | M2                             | Protein+Alum | RNf7   | No       |                       |             |        |          |
|                        |             |        |          |                        |             |        |          | M2                             | Protein+NP   | RQm7   | No       |                       |             |        |          |
|                        |             |        |          |                        |             |        |          | M2                             | Protein+NP   | RQq8   | No       |                       |             |        |          |
|                        |             |        |          |                        |             |        |          | M2                             | Protein+NP   | RSp9   | No       |                       |             |        |          |
|                        |             |        |          |                        |             |        |          | M2                             | Protein+NP   | RSb9   | No       |                       |             |        |          |
|                        |             |        |          |                        |             |        |          | M2                             | Protein+NP   | RAj9   | No       |                       |             |        |          |
|                        |             |        |          |                        |             |        |          | M2                             | VLP+Alum     | RVo8   | No       |                       |             |        |          |
|                        |             |        |          |                        |             |        |          | M2                             | VLP+Alum     | RCv5   | No       |                       |             |        |          |
|                        |             |        |          |                        |             |        |          | M2                             | VLP+NP       | RRu5   | No       |                       |             |        |          |
|                        |             |        |          |                        |             |        |          | M2                             | VLP+NP       | RCb6   | No       |                       |             |        |          |
|                        |             |        |          |                        |             |        |          | M2                             | VLP+NP       | RQf6   | No       |                       |             |        |          |
|                        |             |        |          |                        |             |        |          | M2                             | VLP+NP       | RKf10  | No       |                       |             |        |          |
|                        |             |        |          |                        |             |        |          | M2                             | VLP+NP       | ROk9   | No       |                       |             |        |          |

DDMM = two DNA primes followed by two MVA boosts

DgDgMM = two DNA primes adjuvanted with GM-CSF followed by two MVA boosts

DM/CD40L = two DNA primes adjuvanted with CD40 Ligand followed by two MVA boosts

NP = PLGA nanoparticles with TLR ligands MPL plus R848

VLP = virus like particles
